# Supplementary material for: Mg–Fe mixed oxides as solid base catalysts for the transesterification of microalgae oil
Source: Royal Society of Chemistry journal article supplement (doi:10.1039/c5ra14144c), 2015-01-01

## Supplementary material

**Fig. S1.** The pH titration curve of the mixed solution for the precipitation of the Mg-Fe LDH with Mg/Fe molar ratio of 3.0 at 40°C for 2 h by adding 0.5 mol·L<sup>-1</sup> NaOH solution by co-precipitation method only using NaOH as precipitator.

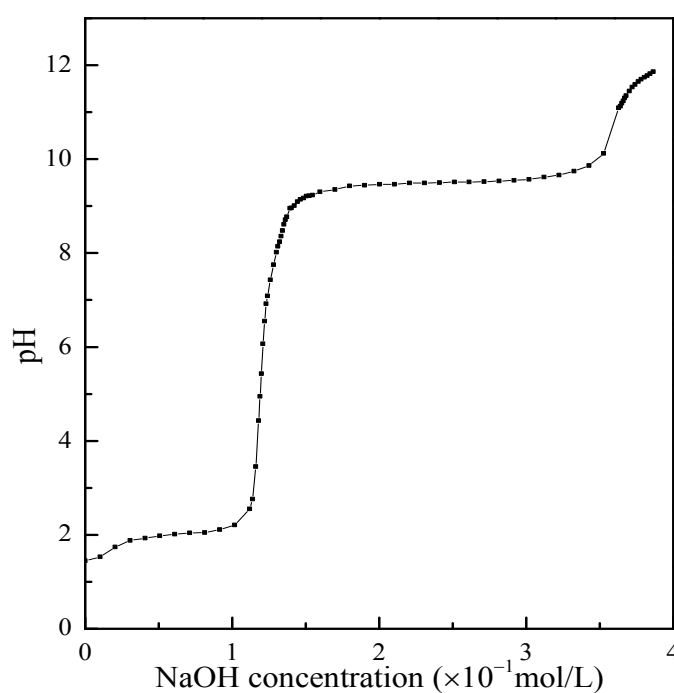

Supplement: c5ra14144c1.pdf [file c5ra14144c1.pdf]
